# Supplementary material for: Differential Triggering of the Phenylpropanoid Biosynthetic Pathway Key Genes Transcription upon Cold Stress and Viral Infection in Tomato Leaves
Source: MDPI journal article supplement (doi:10.3390/horticulturae7110448), 2021-11-02
Supplement: s1 [file s1]

Archive with 5 entries (5 files):
- Suplementary data. File 1.pptx
- Supplementary data File 2.pptx
- Supplementary Figures S1-S3.pdf
- Supplementary Table S4 Primers sequences.pdf
- Supplementary Tables S1-S3 Physiological parametres .pdf
