# Supplementary material for: Differential Triggering of the Phenylpropanoid Biosynthetic Pathway Key Genes Transcription upon Cold Stress and Viral Infection in Tomato Leaves
Source: MDPI journal article supplement (doi:10.3390/horticulturae7110448), 2021-11-02

Supplementary Figure S1. Phylogenetic analysis of tomato 4CL proteins created using the online tools of phylogeny.fr

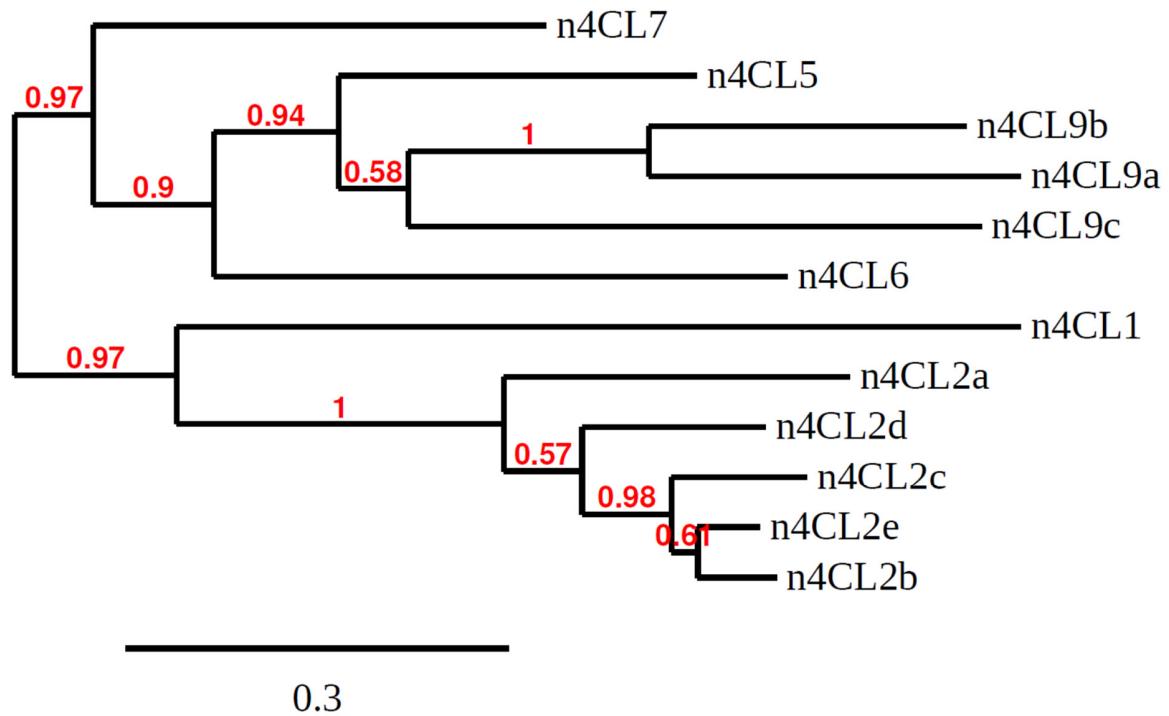

Supplementary Figure S2. Phylogenetic analysis of tomato CHS proteins created using the online tools of phylogeny.fr

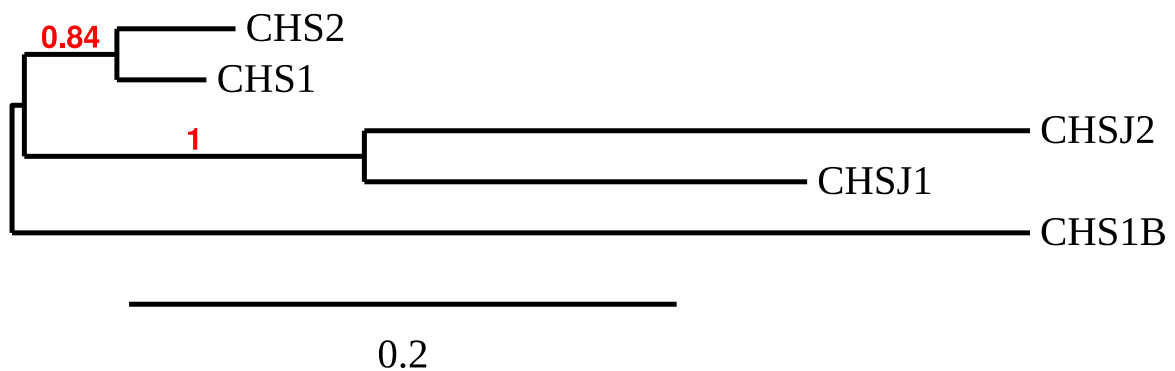

Supplementary Figure S3. Time-bar with the treatments of this experiment.

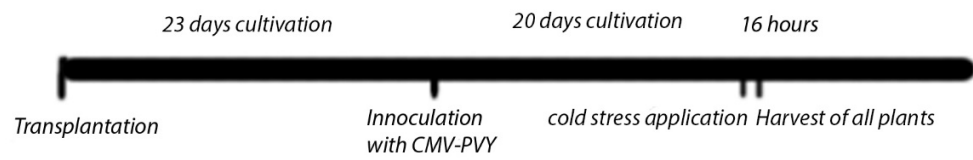

Supplement: s1 [file s1 › Supplementary Figures S1-S3.pdf]
