# Supplementary material for: Differential Triggering of the Phenylpropanoid Biosynthetic Pathway Key Genes Transcription upon Cold Stress and Viral Infection in Tomato Leaves
Source: MDPI journal article supplement (doi:10.3390/horticulturae7110448), 2021-11-02
Supplement: s1 [file s1 › Supplementary Table S4 Primers sequences.pdf]

**Supplementary Table S4.** Primer sequences of genes used for qPCR

| Encoded enzyme name                              | Gene         | Gene Accession no. (NCBI) | Primer sequences                              |
|--------------------------------------------------|--------------|---------------------------|-----------------------------------------------|
| Phenylalanine ammonia-lyase                      | <i>PAL</i>   | XM_004234584.3            | CGGTGAGGAGATTGATAA<br>TTAGCAGATTGGAATAGGA     |
| trans-cinnamate 4-monooxygenase 1                | <i>C4H1</i>  | XM_004242430.4            | GAGTAGATTGGCACAGAG<br>TCTCCTTAACCTCCTTACA     |
| trans-cinnamate 4-monooxygenase 2                | <i>C4H2</i>  | XM_004240074.4            | GTGTTGTATATTGTGGAGAAT<br>CTGTGACTGACTTACCTT   |
| flavonol synthase/flavanone 3-hydroxylase 1      | <i>FLS1</i>  | XM_004250281.4            | TGAAGAAGTAGCACAAGA<br>GCCAATAATGATAGTTAATAGC  |
| flavonol synthase/flavanone 3-hydroxylase-like 2 | <i>FLS2</i>  | XM_004242121.4            | CTGGTTCTGACTACAATATC<br>GACATTCACCTTAGGATTCTT |
| flavonol synthase/flavanone 3-hydroxylase-like 3 | <i>FLS3</i>  | XM_019213093.2            | CGCAGCATTACACCTCAT<br>CCTTCCAACACAACCTCCTAA   |
| chalcone synthase 1                              | <i>CHS1</i>  | NM_001247104.2            | GGCTTACATTCCACTTAC<br>GAGAGTTCCAGTCAGATA      |
| chalcone synthase 2                              | <i>CHS2</i>  | NM_001247107.2            | TTGGATAGTATGGTTGGA<br>TCTGGTAATGGATCTGAA      |
| chalcone synthase B                              | <i>CHSB</i>  | XM_004239850.1            | TGAAGACTACTGGAGATG<br>CATACTACGAAGCACAAAC     |
| chalcone synthase J-like                         | <i>CHSJ1</i> | XM_010316555.2            | GGACTTGCTAATGTGTTG<br>GTTCACTCTTATGTTCACTATT  |
| chalcone synthase J                              | <i>CHSJ2</i> | XM_026031338.1            | GACTACCAACTCACTAAG<br>GAACATACAACAAGAACTC     |
| 4-coumarate--CoA ligase-like 1                   | <i>4CL1</i>  | XM_004232127.4            | GTTATCCACCCTGACGACCC<br>AATTCGGGTTGTGCGCCATCT |
| 4-coumarate--CoA ligase                          | <i>4CL2a</i> | NM_001346865.1            | GTTATCCACCCTGACGACCC<br>AATTCGGGTTGTGCGCCATCT |
| 4-coumarate--CoA ligase                          | <i>4CL2b</i> | NM_001346841.1            | TACCGCCTATTGTTCTCGCC<br>GACCAGCTTCCGTCATTCCA  |
| 4-coumarate--CoA ligase-like                     | <i>4CL2c</i> | NM_001346847.1            | TGAGAATGATGTGAAGGT<br>TTAGAGGTGAATCCAGAAT     |
| 4-coumarate--CoA ligase                          | <i>4CL2d</i> | XM_004242742.3            | CCTATTGTATTGGCTATTGC<br>GCTCTAACGGTATCTTCAA   |
| 4-coumarate--CoA ligase                          | <i>4CL2e</i> | NM_001346845.1            | GGCGATATTGGTTATATTGAC<br>GGATGATTGAGGAGAAGG   |
| 4-coumarate--CoA ligase-like 5                   | <i>4CL5</i>  | XM_004253081.4            | GAGCCGGAGATATGGAACGG<br>ACTCTGCTGGAGGAACCTGA  |
| 4-coumarate--CoA ligase-like 6                   | <i>4CL6</i>  | XM_004245889.4            | TTGTGGACTCAGCTTCTGGC<br>TAACGCCTTTTCCACACCA   |
| 4-coumarate--CoA ligase-like 7                   | <i>4CL7</i>  | XM_004251059.4            | TCAACAATCCACAGGCCACA<br>CTCAGCATCAGGAAACGGGA  |

|                                |              |                |                                                     |
|--------------------------------|--------------|----------------|-----------------------------------------------------|
| 4-coumarate--CoA ligase-like 9 | <i>4CL9a</i> | XM_004233957.4 | CCGGACACTGGAATTGCTCT<br>ATGCCACCCGCCTTATCTTC        |
| 4-coumarate--CoA ligase-like 9 | <i>4CL9b</i> | XM_004236294.3 | TCTCTACTCATCTGGA ACTA<br>ATTAGCGGCATCATCATT         |
| 4-coumarate--CoA ligase-like 5 | <i>4CL9c</i> | XM_004250447.2 | ATGTCAAGTGAAGGAGAA<br>CTGTGTCAAGGTTAGAATAG          |
| Ubiquitin                      | <i>UBQ</i>   | NM_001345879.1 | GCAGACTATAACATCCAGAAAGAG<br>AACAAACAAAGCACACAGCCATC |
| Actin                          | <i>Actin</i> | NM_001330119.1 | GAAATAGCATAAGATGGCAGACG<br>ATACCCACCATCACACCAGTAT   |
