# Supplementary material for: Differential Triggering of the Phenylpropanoid Biosynthetic Pathway Key Genes Transcription upon Cold Stress and Viral Infection in Tomato Leaves
Source: MDPI journal article supplement (doi:10.3390/horticulturae7110448), 2021-11-02
Supplement: s1 [file s1 › Supplementary Tables S1-S3 Physiological parametres .pdf]

**Supplementary Table S1.** Above ground biomass

| <b>Treatment</b> | <b>Above ground biomass (g)</b> | <b>Stdev</b> | <b>Homogeneous groups</b> |
|------------------|---------------------------------|--------------|---------------------------|
| Control          | 10,365                          | 1,456        | <b>a</b>                  |
| CMV infected     | 10,635                          | 1,332        | <b>a</b>                  |
| PVY infected     | 10,074                          | 1,675        | <b>a</b>                  |
| Cold Stress      | 9,788                           | 1,532        | <b>a</b>                  |

**Supplementary Table S2.** Stem length

| <b>Treatment</b> | <b>Stem length (cm)</b> | <b>Stdev</b> | <b>Homogeneous groups</b> |
|------------------|-------------------------|--------------|---------------------------|
| Control          | 13,385                  | 1,799        | <b>a</b>                  |
| CMV infected     | 12,195                  | 1,313        | <b>a</b>                  |
| PVY infected     | 12,588                  | 1,590        | <b>a</b>                  |
| Cold Stress      | 11,897                  | 1,750        | <b>a</b>                  |

**Supplementary Table S3.** Chlorophyll content (chlorophyll meter SPAD-502) in SPAD units

| <b>Treatment</b> | <b>Chl content (SPAD units)</b> | <b>Stdev</b> | <b>Homogeneous groups</b> |
|------------------|---------------------------------|--------------|---------------------------|
| Control          | 34.5                            | 3.2          | <b>a</b>                  |
| CMV infected     | 33.8                            | 4.1          | <b>a</b>                  |
| PVY infected     | 33.2                            | 3.8          | <b>a</b>                  |
| Cold Stress      | 31.6                            | 3.4          | <b>a</b>                  |
